# Supplementary figures and images for: Efficacy of oats in dyslipidemia: a systematic review and meta-analysis
Source: Royal Society of Chemistry journal article supplement (doi:10.1039/d3fo04394k), 2024-01-01

### Supplementary File 3 Egger's test for publication bias

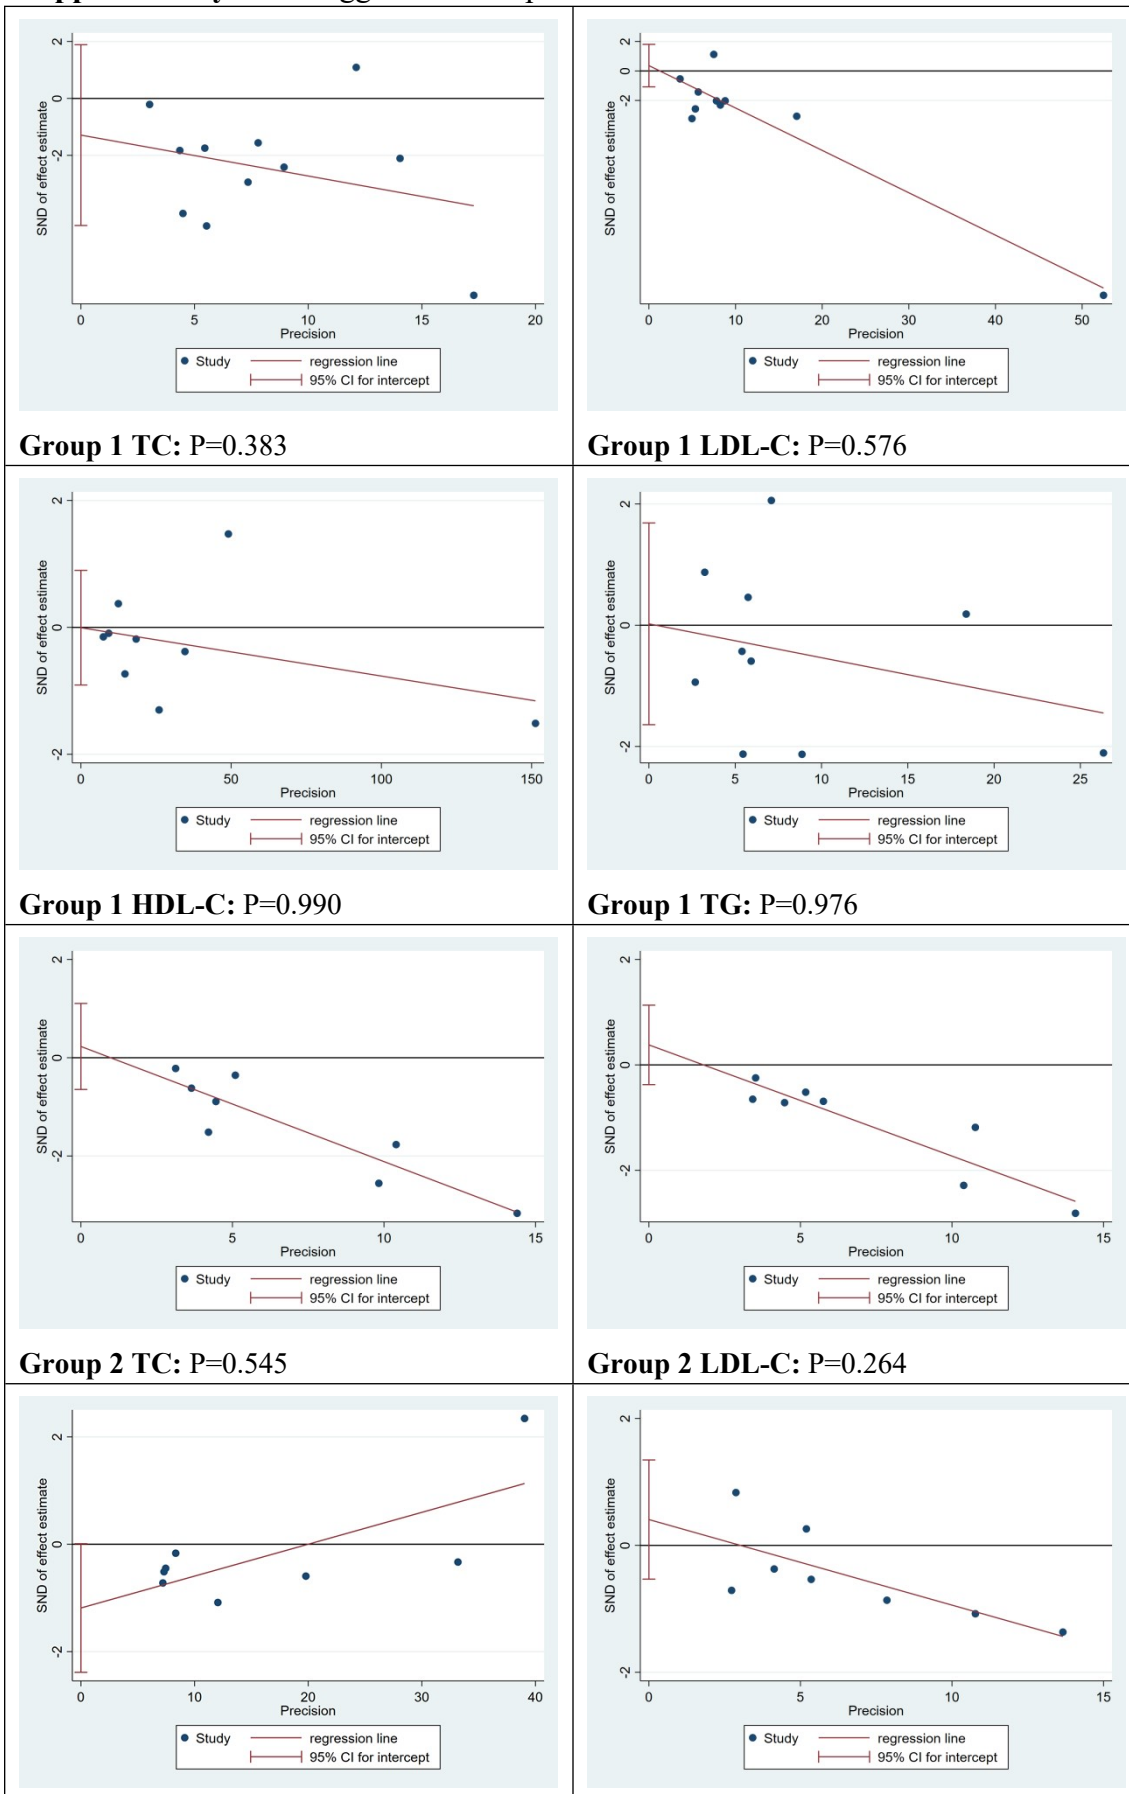

**Group 2 HDL-C: P=0.052**

**Group 2 TG: P=0.330**

Supplement: d3fo04394k4.pdf [file d3fo04394k4.pdf]
